# Supplementary material
Source: Elsevier journal article supplement (https://comptes-rendus.academie-sciences.fr/physique/article/10.1016/j.crhy.2011.06.003/file/attach/mmc1.pdf)
Supplement: mmc1 [file mmc1.pdf]

# Nanosciences : evolution or revolution ?

## Les nanosciences : (r)évolution des savoirs et des technologies ?

### Jean-Louis Pautrat

Physicien, ancien Directeur de la Fondation "Nanosciences aux limites de la nanoélectronique"

23 rue des Martyrs, 38000 Grenoble

#### *Abstract*

In miniaturised objects fabricated by modern technology the smallest linear size may be of a few nanometers. In the field of microelectronics, the advantages of such a miniaturisation are huge (increased complexity and reliability, reduced costs). The technology is now approaching the limits where further size reduction will be impossible, except for very novel techniques such as molecular electronics. Miniaturization research has also led to the discovery of nanometric objects such as carbon nanotubes, which turn out to be particularly appropriate for inventing new materials. Miniaturization techniques have been progressively applied in other fields, with the hope of obtaining improvements similar to those encountered in microelectronics. Examples are bio chips, which concentrate on a few  $\text{cm}^2$  the recognition of ADN sequences, or 'lab-on-a-chip' devices, each of which constitutes a whole laboratory of chemical analysis, or MEMs (Micro ElectroMechanical Systems). New therapies will use miniaturized objects with multiple functions: For instance a nanoparticle can both recognize the target organ thanks to an appropriate protein, and deliver the therapeutic molecule to this target. These results have only been possible through new observation instruments, able to observe and manipulate nano objects. Is the observed evolution really a revolution of science and techniques? This is a point discussed in the conclusion, which also deals with risks associated to nanotechnologies, while the need for a social regulation is stressed.

#### *Résumé*

La miniaturisation a conduit à la fabrication d'objets dont les plus petites dimensions sont de quelques nanomètres. Dans le domaine de la microélectronique ceci a apporté des avantages considérables (complexité accrue, fiabilité augmentée, coûts réduits). Cette technologie parvient maintenant au voisinage de limites qui lui interdiront très bientôt de poursuivre la réduction des dimensions sauf à s'engager dans des voies très nouvelles telles que celles de l'électronique moléculaire. La recherche en miniaturisation a aussi permis d'aboutir à la découverte d'objets nanométriques tels que les nanotubes de carbone qui se révèlent être des composants de choix pour synthétiser des matériaux nouveaux. Les techniques de miniaturisation ont été progressivement appliquées à d'autres domaines avec l'espoir d'en tirer des avantages similaires à ceux rencontrés dans la microélectronique : les biopuces qui concentrent sur quelques  $\text{cm}^2$  des opérations de reconnaissance de séquences ADN, les laboratoires sur puce qui assemblent tout un laboratoire d'analyse biochimique, les MEMS ou microsystèmes électromécaniques miniaturisés. En médecine, la thérapeutique bénéficie de la maîtrise de la synthèse d'objets miniaturisés rassemblant plusieurs fonctionnalités : par exemple une nanoparticule peut transporter jusqu'à un organe cible à la fois une protéine de reconnaissance de l'organe et une molécule-médicament. Tout ceci n'a été possible que grâce à la mise au point de nouveaux instruments d'observation capables d'observer et de manipuler les nanoobjets.

La conclusion soulève la question suivante « l'ensemble des évolutions observées est-il véritablement signe d'une révolution des sciences et des techniques ? Enfin une dernière partie aborde le sujet des risques associés aux nanotechnologies et souligne le besoin de régulation sociale.

**Mots clés :** miniaturisation ; microélectronique ; nanomatériaux ; nanosciences ; nanomédecine

**Keywords:** miniaturization; microelectronics; nanomaterials; nanosciences; nanomedicine;

## **1 - Introduction**

Tout « honnête homme » qui a étudié un peu de chimie, sait de longue date que la matière inerte ou vivante est constituée d'atomes. Toutefois cette connaissance, toute théorique, est généralement sans effet sur la vie courante. Un atome c'est si petit que c'est en deçà de toute perception. Malgré la découverte de la radioactivité à la fin du XIX<sup>ème</sup> siècle et tous les progrès des sciences physiques, chimiques et biologiques faisant explicitement référence à la nature atomique de la matière, la vie réelle pouvait bien continuer à ignorer les briques de base dont tout était fabriqué. Cependant, à la fin du XX<sup>ème</sup> siècle, l'apparition des nanotechnologies sur le devant de la scène, inévitablement, nous a fait sentir que les dimensions nanométriques, voisines de la taille de l'atome, n'étaient plus en dehors de notre perception et de notre capacité d'action. Les nanos s'invitaient dans la vie de tous les jours !

Mais revenons un peu en arrière.

La découverte du transistor en 1947 a révolutionné les techniques de l'électronique en montrant qu'un petit morceau de germanium pouvait faire aussi bien (mieux ?) qu'un tube à vide compliqué et fragile. Ce petit morceau de germanium, remplacé ensuite par du silicium, et qui n'était que de quelques millimètres de côté dans la première réalisation, a ensuite été réduit à des dimensions de plus en plus petites, gros comme une « puce ». Les principes de fonctionnement des transistors ayant été bien compris, on a pu mettre plusieurs transistors sur un même morceau de matériau semiconducteur et les assembler pour réaliser une fonction électronique complexe, un microprocesseur. Déjà en 1971 on pouvait en assembler 2300 dans un même « processeur ». Ensuite l'histoire de l'électronique a surtout été, pendant longtemps, une histoire de la miniaturisation. Comment faire les mêmes circuits sur un morceau de silicium de plus en plus petit. Il y avait plusieurs avantages à cette miniaturisation : le circuit était plus rapide, il était moins cher et il s'avérait plus fiable !

La miniaturisation a progressé en tirant profit toutes les ressources de la technique: utilisation de masques photographiques, gravures chimiques de plus en plus contrôlées, gravures ioniques très directives, utilisation de rayonnements de longueur d'onde de plus en plus courte pour le transfert des motifs, écriture directe du masque avec un faisceau d'électrons ... La réduction des dimensions a suivi un parcours régulier sans faute. Le plus petit motif réalisé dans les circuits commerciaux est passé de 0,35  $\mu\text{m}$  en 1995, à 0,13  $\mu\text{m}$  en 2001 pour se trouver à 0,065  $\mu\text{m}$  en 2007 et finalement autour de 0,028  $\mu\text{m}$  en 2010. L'avantage connexe lié à cette réduction des dimensions a été l'augmentation du nombre de transistors sur une même puce. Il est passé de 2300 en 1971, comme on l'a dit, à plus de 2 milliards en 2010 en doublant régulièrement tous les 2 ans.

Les dimensions atteintes à la fin du XX<sup>ème</sup> siècle, nous font indubitablement pénétrer dans l'échelle du nanomètre : un milliardième de mètre, un millième de micromètre. Aujourd'hui un motif de 22 nm c'est une bande de silicium dont la largeur ne comprend que 60 atomes environ. La microélectronique est donc entrée dans l'ère de la nanoélectronique. D'autres domaines de la science et de la technologie ont également fait leur révolution nano, qu'ils aient été stimulés par leur dynamique propre ou par les progrès remarquables de l'électronique et de l'informatique et des multiples outils (masqueurs, graveurs) et instruments d'observation (microscopes) dont l'éclosion a été remarquable. Nous allons passer en revue ces différents domaines.

## **2 – De la microélectronique à la nanoélectronique**

La diminution très rapide de la taille des composants électroniques a eu plusieurs conséquences : augmentation considérable de la puissance de calcul et de traitement de

l'information, réduction du coût des composants et accroissement de la fiabilité. Le résultat a été une pénétration de la microélectronique dans de nombreux domaines où on ne l'attendait pas forcément. L'expérience quotidienne de tout un chacun suffit à s'en convaincre. Bien plus des domaines complètement nouveaux ont été créés dans le sillage de cette électronique puissante et bon marché : les jeux électroniques, les télécommunications à haut débit, le téléphone mobile et internet pour ne citer que ceux correspondant aux marchés les plus massifs. Il est clair que les derniers cités sont devenus des facteurs majeurs de transformation de la vie sociale (communication, accès à la culture, transformation du maillage social ...). En ce sens la nanoélectronique est l'agent d'une révolution en cours dont les dernières phases ne nous sont pas encore connues.

Jusqu'où la réduction de taille des composants va-t-elle se poursuivre ? Il est clair, depuis longtemps qu'un mur « infranchissable » va bloquer la réduction des dimensions. En effet autour de 10 nm les conditions de fonctionnement des composants électroniques vont se trouver sérieusement affectées : la discontinuité de la matière ne peut plus être ignorée puisque la taille d'un atome c'est 0,3 nm environ. Le nombre d'électrons mis en jeu dans les dispositifs nanoélectroniques n'est plus nécessairement très grand. Les lois statistiques qui gouvernent le transport diffusif des électrons ne sont alors plus adaptées puisque certains électrons peuvent passer d'une électrode à l'autre sans subir aucune collision tandis que d'autres ne passeront pas du tout. Leur transport est balistique. On a même imaginé et commencé à développer des transistors dont le fonctionnement repose sur le transfert d'un seul électron. Ces problèmes s'ajoutant au fait que les difficultés de fabrication s'accroissent quand la taille diminue, la nanoélectronique va bientôt se trouver au pied d'un « mur » difficilement franchissable. Cela signifie-t-il que dans 3 ou 4 ans la microélectronique va se trouver figée et ne pourra plus progresser dans tous ces domaines où elle s'est illustrée ? : complexité, fiabilité et réduction des coûts. Bien sûr que non. La taille ultime des composants n'est pas tout. Même avec une taille de motif constante, il est encore possible d'améliorer l'architecture des processeurs (multicoeurs), les mémoires ont encore des marges de progression (mémoires magnétiques notamment), la communication interne au processeur peut également gagner en rapidité. De plus, l'essentiel de la compacité des circuits électroniques a été obtenu en concentrant tous les composants dans un seul plan, la surface du cristal de silicium. La mise au point de techniques d'empilement à 3 dimensions permettrait de concentrer encore plus de circuits dans un même boîtier. Enfin, la réduction de la consommation d'énergie des processeurs permettra d'augmenter la compacité des circuits sans craindre d'échauffement et d'augmenter encore l'autonomie de l'électronique nomade.

Quoi qu'il en soit, la microélectronique silicium va certainement atteindre une butée, un optimum qui résultera à la fois des difficultés techniques de toute nouvelle amélioration et du renchérissement des circuits que celle-ci entraînerait. Ensuite, on imagine que la nouvelle phase consistera à entrer dans l'électronique moléculaire. L'élément actif, le transistor, serait alors remplacé par une seule molécule connectée par des fils moléculaires. Imaginée de longue date, cette nouvelle séquence n'approche que lentement. Toutefois il existe déjà des circuits d'électronique organique, des afficheurs à OLED (Organic Light Emitting Diode). Des prototypes de mémoire dans lesquels le siège de l'effet mémoire est une unique molécule située au point de croisement de deux conducteurs ont déjà été fabriqués : la densité de points mémoires se trouve alors augmentée par plusieurs ordres de grandeur. Un autre domaine prospectif est celui qui cherche à remplacer le transistor en silicium par une seule molécule connectée à 3 électrodes. Celles-ci pourraient être des fils conventionnels ou bien être elles-mêmes constituées de chaînes moléculaires conductrices. Le jour où ces composants moléculaires seront au point la miniaturisation fera encore un saut considérable. La microélectronique puissante et bon marché a encore de beaux jours devant elle.

### 3 – Nanomatériaux et nanochimie

Alors que la microélectronique s'efforce de graver le cristal de silicium pour ne conserver que de minuscules transistors, une autre approche s'est fait jour utilisant les voies relativement classiques de la synthèse chimique. La chimie produit naturellement des entités nanométriques, des molécules, plus ou moins complexes. L'art consiste à orienter les voies de synthèse vers la production soit de molécules spécialement conçues pour remplir des fonctions complexes soit vers la fabrication d' « objets », comprenant des milliers ou plus de molécules élémentaires correctement assemblées et dédiés à des fonctions données. Cette voie sera qualifiée de *bottom up* (par opposition à la voie traditionnelle de la microélectronique dite *top down*).

Nous allons préciser ceci sur un certain nombre d'exemples et constater que la matière montre parfois une certaine bonne volonté à prendre la forme d'objets nanométriques aux propriétés remarquables.

**Les nanotubes de carbone.** Ils ont été découverts par hasard en 1991 par un chercheur japonais Sumio Iijima qui examinait au microscope électronique les suies formées par un arc électrique. Ce sont des tubes formés par l'enroulement sur lui-même d'un plan de graphène (agencement d'atomes de carbone semblable à celui d'un feuillet de graphite dans lequel les électrons de la couche externe du carbone sont tous appariés), si bien que le nanotube de carbone a la constitution d'un cristal parfait. Les nanotubes ont des diamètres de quelques nanomètres pour des longueurs de plusieurs centaines ou milliers de nanomètres. Ils peuvent être conducteurs ou isolants. Ils ont des propriétés mécaniques remarquables car ils peuvent plier sans se rompre et leur masse est très faible car le carbone est un atome léger. Leur grande surface spécifique (l'intérieur, aussi bien que l'extérieur du tube sont des surfaces) leur confère d'importantes capacités d'adsorption. Des techniques de synthèse permettent désormais de les fabriquer en quantité importante. Ils ont déjà trouvé de nombreuses applications : renforcement d'objets (raquettes de tennis), adjonction à des résines pour les rendre conductrices, cathodes émettrices d'électrons, adsorbants de gaz à grande efficacité ...

En cherchant à comprendre le mécanisme de la formation des nanotubes, on a découvert qu'ils prenaient naissance à la surface d'une nanogoutte métallique. Celle-ci absorbe du carbone à partir de la vapeur qui l'entoure. Le carbone en sursaturation est éliminé sous forme d'une couronne à la surface de la goutte. Le nanotube se formait donc un peu comme le tube de laine fabriqué par un tricotin. Ce principe a également été mis en œuvre pour fabriquer de nombreux autres nanotubes ou nanofils, de semiconducteurs notamment : silicium, ZnSe, ZnO, MgO. Les nanofils semiconducteurs peuvent en outre être dopés en cours de croissance et ce dopage peut varier si bien qu'un nanofil peut être synthétisé sous forme de diode électronique. Ces nouveaux composants sont bien adaptés à l'émission ou l'absorption de lumière car la forme même du nanofil lui permet d'échapper à certaines limitations sur l'entrée ou la sortie de la lumière rencontrées dans les composants planaires. Des cellules solaires à grande efficacité, des LED bleues ou UV sont en développement.

Les remarquables propriétés des nanotubes de carbone constitués d'un plan de graphène enroulé sur lui-même ont encouragé les chercheurs à explorer les propriétés des plans de graphène eux-mêmes. Ils peuvent être obtenus directement par exfoliation d'un échantillon de graphite, ou par croissance cristalline sur un substrat de carbure de silicium SiC. Les propriétés de ce matériau se sont avérées exceptionnelles : très haute mobilité électronique, possibilité de moduler celle-ci par un champ électrique transversal etc. Des prototypes de transistors FET fonctionnant à très haute fréquence et même un élément de circuit logique ont déjà été réalisés. Le physicien néerlandais d'origine russe André Geim a reçu en 2010 le prix Nobel pour ses travaux sur le graphène. Il est possible que ce nouveau matériau soit un candidat sérieux pour la microélectronique du futur.

**Nanoparticules.** La mise au point des techniques de synthèse de nanoparticules permet de préparer sous cette forme une grande diversité de produits: or, argent, silice, oxyde de titane, carbone (fullérènes) et de nombreux types de semiconducteurs. En particulier des semiconducteurs tels que le séléniure de cadmium qui, à l'état massif, émettent de la lumière infrarouge lorsqu'ils sont soumis à un rayonnement UV, se trouvent émettre de la lumière visible lorsqu'ils sont préparés sous forme de nanoparticules. La couleur de cette lumière dépend de la taille des nanoparticules. Ces nanoparticules fluorescentes constituent un nouveau type de marqueur fluorescent efficace et stable utilisé dans de nombreuses expériences de biologie.

Les nanoparticules peuvent également être dotées de fonctions complémentaires en greffant des molécules actives ou des revêtements spécifiques (médicament, agent de contraste, absorbeur de rayonnement etc). Nous y reviendrons un peu plus loin en décrivant les applications dans le domaine des nanobiotechnologies.

**Nanochimie.** La fabrication de tous ces objets que nous venons d'évoquer fait appel à différents secteurs de la chimie que l'on a désormais tendance à englober sous le vocable de nanochimie. La chimie a toujours eu pour objet de synthétiser des molécules dont les dimensions sont indéniablement nanométriques voire subnanométriques. Mais par ce concept de nanochimie on désigne une chimie ciblée sur la fabrication d'objets obtenus par l'assemblage de molécules élémentaires et dont la taille finale, située dans les nanomètres, leur confère des propriétés spécifiques. Parmi les nombreux domaines de cette nanochimie, non abordés dans les exemples ci-dessus nous citerons:

- Les matériaux massifs nanostructurés utilisant les principes de l'autoorganisation,
- La chimie supramoléculaire conduisant à l'autoassemblage de plusieurs molécules,
- La nanostructuration par empreinte moléculaire qui aboutit à la création de matériaux synthétiques, organiques ou inorganiques, possédant des cavités de reconnaissance moléculaire spécifique.

La diversité des matériaux conduit à toute une palette d'applications. Nous n'en citerons que quelques unes :

- Les nanoparticules d'oxyde de titane pour la protection solaire. Leur petite taille leur fait perdre leur couleur blanche sans pour autant faire disparaître leurs capacités d'absorption de la lumière ultraviolette.
- Les nanoparticules d'oxyde de titane, encore, qui catalysent la destruction des polluants organiques. Incorporées au béton elles évitent son noircissement.
- Les vitres autonettoyantes d'où les salissures sont éliminées par l'eau de pluie : elles sont recouvertes d'un film rendu super-hydrophobe par une nanostructuration comparable à celle observée sur la feuille de lotus.
- Les nanoparticules d'argent bactéricides incorporées à des textiles.
- Le renforcement des bandes de roulement des pneus grâce à l'incorporation de particules de silice, etc.

La nanochimie est donc un acteur essentiel des nanotechnologies. Elle crée les briques de base qui serviront à la fabrication d'édifices plus complexes. C'est aussi la science qui fera passer les découvertes liées aux nanotechnologies dans des produits et des matériaux de grande consommation où on ne les attendait pas forcément (béton, pneus, peintures ...).

## **4 - Nanobiotechnologies**

Durant les dernières décennies du siècle passé, la biologie a également traversé une ère de transformations remarquable. La mise en évidence du code génétique, son décryptage, la mise en œuvre de moyens puissants de synthèse ont peu à peu, là aussi, rendu évident que la vie elle-même était une affaire d'atomes et de molécules. Certes le vivant est fait de

macromolécules et sa complexité est redoutable, mais de nombreux points de rapprochement entre biologie et nanotechnologie ont peu à peu émergé, c'est le domaine des nanobiotechnologies. Nous allons citer les principales applications qui découlent de ces rapprochements.

#### **4.1 Les biopuces**

Les biopuces, comme leur nom semble l'indiquer, proviennent d'un rapprochement entre puce électronique et biologie. Le nom est quelque peu hasardeux, car la taille des puces n'est plus si petite, mais il est consacré par l'usage. Première catégorie de biopuce, la puce à ADN. Avec ce composant l'objectif est de déterminer simultanément un grand nombre de séquences d'ADN présentes dans un génome à analyser. Des sondes d'ADN synthétiques, complémentaires des séquences recherchées sont immobilisées sur une plaque support, en verre ou en silicium. Les différentes sondes sont rangées de façon matricielle. A chaque séquence est attribuée une petite zone de la plaque. Celle-ci est mise en contact avec une solution contenant l'ADN à analyser, préalablement marqué par des molécules fluorescentes. Lorsqu'il y a complémentarité entre une séquence synthétique et une séquence présente dans la solution analysée, une certaine quantité d'ADN se fixe sur la plaque par hybridation moléculaire. La détection de la fluorescence permet d'identifier les séquences présentes. La réalisation des biopuces utilise des techniques de miniaturisation dérivées de la microélectronique. Elles permettent de fabriquer des plaques contenant des dizaines de milliers de sondes, si bien que l'ensemble des gènes d'un organisme peut être étudié au cours d'une seule expérience.

L'identification de l'ADN d'une cellule ne donne pas directement l'image des gènes actifs à un moment donné dans la cellule. Pour être plus précis sur ce point, on a imaginé des puces à protéines où l'on cherche à identifier les protéines synthétisées par les gènes actifs à un instant donné. Leur principe est semblable à celui de la puce à ADN. On réalise une matrice de récepteurs présentant chacun une grande affinité pour l'une des protéines à identifier et doser. La difficulté consiste justement à disposer, pour chaque protéine des peptides ou d'autres composants moléculaires pour lesquels les molécules à analyser présentent une grande affinité et une forte spécificité. Ceux-ci sont fixés sur la puce. Ensuite la puce est mise en contact avec la solution à analyser dont les protéines ont été préalablement munies d'un marqueur fluorescent ou radioactif ou autre.

La biopuce à cellules vivantes constitue encore une autre variante des biopuces. Dans ce cas, on va immobiliser sur la puce des cellules vivantes disposées en matrice en les plaçant dans des puits aménagés sur la puce. Chaque puits peut être équipé d'une électrode de stimulation ou d'un canal pour soumettre la cellule qui y est fixée à un traitement spécifique (transfection d'un gène par exemple). De cette façon, un grand nombre de cellules soumises à un jeu de paramètres différents peuvent être analysées simultanément. Bien que les dimensions ne soient pas nanométriques, le terme de nanobiotechnologie est employé par analogie pour ces microsystèmes.

#### **4.2 Laboratoires sur puce**

De nombreux actes médicaux reposent sur la détection de molécules biologiques ou chimiques présentes dans l'organisme. Cette détection doit être fiable et si possible rapide et quantitative. Ce même besoin existe également pour mener à bien les contrôles sanitaires dans l'industrie agroalimentaire ou pour la surveillance de l'environnement. Classiquement une telle analyse suppose de réaliser un prélèvement, d'en extraire les éléments à analyser, de les

purifier et finalement de les doser. Pour réaliser ces opérations, les laboratoires sont équipés d'instruments de mesures spécifiques. L'obtention d'un résultat satisfaisant nécessite de disposer d'un certain volume de prélèvement, de réactifs et d'un temps minimum pour effectuer les opérations. Toutes ces conditions peuvent s'avérer pénalisantes, soit du fait du coût de l'analyse, de ses délais ou de l'inconvénient de devoir transporter les prélèvements jusqu'au laboratoire.

Le développement des techniques de microélectronique a conduit au début des années 1990 à imaginer le concept de laboratoire sur puce. Une plaque de silicium, de verre ou de plastique d'une dizaine de  $\text{cm}^2$  va servir de support au « laboratoire » qui sera fabriqué en utilisant toutes les ressources des microtechnologies : gravure de canaux, de réservoirs, de filtres ; intégration de pompes de circulation, de résistances chauffantes ou de systèmes de refroidissement rapide, d'actuateurs, injection localisée de réactifs ; insertion de détecteurs électriques ou magnétiques etc. Les laboratoires sur puce se sont donc développés pour réaliser tout ou partie d'un processus complet d'analyse.

Le transport des fluides dans les canaux est décrit par les lois de la micro fluidique. Pour l'essentiel les écoulements sont laminaires et les mélanges se font uniquement par diffusion. La mise en mouvement des fluides peut être réalisée par l'application d'un champ électrique le long du canal (phénomène d'électro-osmose). Pour purifier un prélèvement et éliminer les particules les plus grosses, on peut utiliser la différence des coefficients de diffusion. On peut aussi réaliser un filtre traditionnel par gravure de pores dans une membrane. Un système de chromatographie d'affinité, qui retient sur la surface d'une phase solide les analytes d'intérêt, peut être implanté : le fluide est forcé de circuler au sein d'une forêt de piliers dont les surfaces ont été fonctionnalisées pour retenir l'analyte. Les piliers peuvent être réalisés par la gravure du support. Ils peuvent aussi être obtenus en enfermant des microbilles dans une chambre de réaction creusée dans le substrat.

De nombreuses fonctions ont ainsi pu être réalisées au sein des microlaboratoires. Par exemple l'amplification des acides nucléiques d'un prélèvement d'ADN par la réaction dite PCR (Polymerase Chain Reaction) qui nécessite des opérations successives de chauffage et de refroidissement.

Un laboratoire sur puce contient finalement un système de détection, généralement basé sur des procédés optiques ou électriques qui fournit le résultat de l'analyse proprement dit.

Les laboratoires sur puce constituent une voie de recherche très active. Des fonctions particulières ont été déjà réalisées avec succès. L'intégration complète d'un dispositif complet d'analyse reste encore en projet. L'aboutissement de la mise au point de tels microdispositifs permettra de proposer de nombreuses applications nouvelles que ce soit pour mener à bien des analyses environnementales sur le terrain, ou pour préciser un diagnostic médical au chevet du malade ou même pour mener à bien des contrôles agroalimentaires décentralisés.

### **4.3 Vecteurs nanoparticulaires**

La mise au point de nouvelles approches thérapeutiques repose souvent sur la détermination de la meilleure voie d'administration de la molécule active, voie qui lui permettra d'atteindre l'organe malade sans subir auparavant dégradation ou élimination. Le vecteur du médicament doit permettre à la fois d'augmenter son efficacité et de réduire sa toxicité. De ce point de vue, les nanoparticules peuvent constituer une approche intéressante car elles permettent d'imaginer de multiples stratégies de furtivité (pour ne pas être reconnues comme intruses), de reconnaissance cellulaire (pour atteindre une cible donnée), de pénétration dans l'organe (transport via les vaisseaux sanguins, passage à travers l'épithélium). La taille sera un élément déterminant en fonction de l'organe ciblé.

Les vecteurs nanoparticulaires sont des assemblages organisés de molécules. On distingue :

- les nanoparticules lipidiques, sphères solides auxquelles on peut incorporer la molécule active,

- les micelles constituées de molécules présentant une partie hydrophile et une partie hydrophobe. En milieu aqueux elles s'organisent en monocouche sphérique enfermant un réservoir contenant les terminaisons hydrophobes tandis qu'en milieu organique, les micelles inverses se constituent, de façon symétrique, en nanoparticules enfermant un réservoir hydrophile.

- les liposomes sont des phospholipides qui s'organisent en bicouche unilamellaire enfermant un réservoir aqueux. Les liposomes constituent un modèle de membrane cellulaire.

La taille des nanoparticules doit se situer en dessous de 90 nm pour leur permettre la circulation dans les capillaires sanguins et notamment pénétrer dans le foie par les fenêtres de communication entre celui-ci et les vaisseaux.

Pour atteindre sa cible, le vecteur nanoparticulaire devra posséder une surface modifiée pour lui éviter d'être reconnue comme étrangère par les macrophages, ce qui conduirait à son élimination. Pour rendre ce vecteur furtif on va chercher à recouvrir la particule de protéines non reconnues par ces macrophages, comme par exemple celles qui sont présentes à la surface des globules rouges du sang ou des bactéries. Ceci permet effectivement d'augmenter considérablement le temps de présence dans le sang des particules traitées. Pour accroître leur efficacité il faut toutefois favoriser le ciblage de l'organe malade. On fixera par exemple à la surface du vecteur une protéine présentant une grande affinité pour une protéine de surface de la cellule visée. Il faudra toutefois s'assurer de la spécificité de ce ciblage (pour éviter de traiter simultanément des organes qui n'en n'ont pas besoin). On conçoit que la mise au point de ce type de technique est complexe.

On pourra également utiliser des moyens physiques de ciblage. L'encapsulation d'éléments magnétiques permet de concentrer les particules dans une région de l'organisme où l'on applique un champ magnétique externe. On a également fabriqué des liposomes thermosensibles ou pH-sensibles. Les tissus tumoraux présentant une hyperthermie ou un pH acide conduiraient ainsi naturellement à la déstabilisation du liposome et à la libération du principe actif.

Déjà de multiples spécialités mises sur le marché utilisent les propriétés des vecteurs nanoparticulaires principalement dans le domaine de la cancérologie et de l'ophtalmologie. De nombreux essais cliniques sont encore en cours.

**Nanoparticules activables.** Dans ce cas la nanoparticule n'est plus elle-même porteuse d'efficacité. Elle comporte un cœur thérapeutique activable à distance par une source d'énergie. Ce principe développé et mis en œuvre par la société Nanobiotix est décliné dans différentes formulations selon le type de rayonnement utilisé:

- activation magnétique sous l'effet d'un champ radiofréquence tel que celui utilisé en IRM. Le champ produit une rotation rapide des particules produisant une destruction cellulaire locale.

- activation par un rayonnement laser. La destruction cellulaire est le résultat de la création de radicaux libres.

- activation par rayons X. Sous l'effet des rayons, le cœur de la particule libère une grande quantité de radicaux libres à base d'oxygène au niveau de la tumeur. Cet effet permet de diviser par trois la dose de rayons X pour une même efficacité thérapeutique.

- activation par ultrasons.

Dans tous les cas, la substance active constituant le noyau de la particule est enrobé d'une couche de silice qui la rend biocompatible. Pour faciliter sa localisation sur l'organe, la particule est recouverte d'une protéine facilitant la reconnaissance des cellules visées.



L'utilisation de rayonnements localisés accroît encore la spécificité du traitement, puisque les particules sont inactives, en l'absence du rayonnement.

Ce concept de nanoparticules synthétiques comportant la combinaison de plusieurs fonctions illustre parfaitement les potentialités des nanotechnologies dans le domaine biomédical.

## **5 – Systèmes micro- et nano mécaniques**

**MEMS (Micro Electro Mechanical Systems).** Dès les débuts de la microélectronique, dans les années 1970, les technologies ont été utilisées pour fabriquer des éléments de micro systèmes électromécaniques. En effet, les techniques de mise en forme du silicium permettent de fabriquer des objets bien plus petits et bien meilleur marché qu'en utilisant les techniques traditionnelles de la micromécanique. Cette tendance ne s'est pas démentie, la mise en forme d'objets, l'intégration d'actuateurs, et d'éléments électroniques de contrôle permettent de fabriquer de multiples objets pour un coût très faible.

L'application la plus répandue des microsystèmes est le déclencheur d'airbags. La partie sensible est une petite masse de silicium suspendue à de fins bras en silicium. Sous l'effet d'un choc la masselotte fait fléchir les bras et se déplace. Ce mouvement produit une variation de capacité qui est détectée électroniquement. Si le déplacement est supérieur à une valeur préétablie, l'ordre de gonflage du ballon est donné. Le tout est réalisé en un temps très bref.

Autre exemple de microsystème très répandu : les générateurs de gouttes dans les imprimantes à jet d'encre. Ce sont des microcircuits associant électronique et fluide capable de produire à la demande un chapelet de gouttes.

Les microlaboratoires sur puce évoqués plus haut constituent un autre exemple typique de microsystème appliqué à la fluide.

**NEMS (Nano Electro Mechanical Systems).** Les progrès de la miniaturisation rendent désormais possible la fabrication des micro-systèmes dont les dimensions de plus en plus réduites incorporent des éléments nanométriques, d'où leur appellation de NEM's. Ce domaine en est encore à la démonstration de la validité du concept. Pour les quelques équipes travaillant sur ce sujet, l'intérêt de tels dispositifs serait de permettre de travailler à l'échelle de la molécule unique, par exemple pour détecter ou analyser des protéines une à une. Par ailleurs, on peut concevoir des capteurs travaillant à une échelle où les phénomènes quantiques sont prédominants et bénéficiant de ce fait de certaines propriétés particulièrement intéressantes (quantification des photons, du transport électronique ou encore des phonons). Enfin, le fait même de disposer de composants très petits conduit à en fabriquer plusieurs millions simultanément. On peut donc envisager la réalisation de systèmes possédant un haut niveau de parallélisme.

Premier exemple de réalisation significatif, le spectromètre de masse dédié à la détection d'une molécule unique proposé par l'équipe de Michael Roukes à Caltech. L'élément sensible est un fil suspendu de carbure de silicium de 100 nm de large pour une longueur de 2  $\mu\text{m}$ . Il est incorporé dans un circuit électronique résonant piloté par la vibration du fil à très haute fréquence (450 MHz). La fréquence de vibration dépend des propriétés mécaniques du fil et de sa masse. Le capteur est associé à un ensemble classique de spectrométrie de masse qui génère des ions dans une vapeur à analyser. Lorsque le fil capture une molécule, sa masse change et la fréquence de vibration dérive brutalement. Le suivi des événements permet d'identifier la masse des molécules incidentes. La très petite taille du capteur permet d'en monter un grand nombre en parallèle et de bénéficier ainsi de l'accumulation simultanée de milliers, voire millions de mesures.

Dans une autre application, le nanofil peut être traité pour adsorber sélectivement une espèce chimique. La fréquence de résonance du circuit associé à ce capteur va donc être modifiée chaque fois qu'il capturera une molécule de l'espèce visée. En associant un certain nombre de capteurs dédiés sélectivement à différentes molécules il est possible de déterminer la proportion de ces molécules. Cette application baptisée « nez électronique » est donc capable de déterminer le profil des espèces moléculaires présentes dans un échantillon donné. Un des objectifs de ce projet serait la détection précoce de certains cancers en analysant l'exhalaison d'un patient. (Rappelons qu'actuellement on cherche à dresser des chiens pour effectuer cette détection grâce à leur odorat). On peut également penser à de multiples applications dans le domaine agroalimentaire pour contrôler le goût et le parfum des produits.

On peut enfin évoquer ici les recherches sur les moteurs moléculaires. Ces moteurs minuscules existent dans les systèmes vivants sous forme de protéines chargées de transporter les protons à travers la membrane cellulaire (ATP synthase) ou de faire glisser les fibres musculaires l'une le long de l'autre (myosine) ou d'effectuer des transports intracellulaires (kinésine). Certains de ces moteurs peuvent être isolés, fixés ou adsorbés sur un support et leur mise en mouvement détectée. Ils pourraient à n'en pas douter constituer de nouveaux éléments pour un passionnant nano meccano. Mais actuellement on en reste encore au stade des spéculations.

## **6 – Les nouveaux instruments d'observation**

Les nanosciences et les nanotechnologies n'en seraient pas arrivées là si elles n'avaient pas pu disposer de nouveaux instruments innovants, puissants et relativement peu coûteux (ce qui a permis leur large diffusion).

**Le microscope à effet tunnel.** Il a constitué une vraie rupture dans la façon d'envisager l'imagerie. Alors que tous les microscopes fonctionnaient sur le principe de l'œil (un rayonnement éclaire un objet, l'œil capte ce rayonnement et en fabrique une image) l'innovation fut de chercher à fabriquer un instrument fonctionnant sur le principe du doigt. (un non-voyant reconstitue en effet un caractère de braille en promenant son doigt sur la feuille et en sentant les protubérances). L'idée de Gerd Binnig et Heinrich Rohrer fut exactement celle-ci. Approchons une pointe métallique d'une surface et cherchons à repérer sa position en mesurant le courant électrique qui passe entre pointe et surface. Ce courant n'est non nul que si la pointe est assez proche pour qu'il passe un courant par effet tunnel. Ce courant est de l'ordre de 1 nanoampère à une distance de 0,5 nm. En déplaçant la pointe parallèlement à la surface et en cherchant à maintenir ce courant constant la pointe va suivre toutes les aspérités de la surface et permettre d'en reconstituer la topographie. On peut dès lors reconstituer une « image » point par point sans avoir jamais vu celle-ci. Pour obtenir une image de bonne résolution, la première difficulté consiste à fabriquer une pointe suffisamment fine pour se terminer seulement par un atome. Bien que très délicat, ce point est couramment résolu par les expérimentateurs. Seconde difficulté : il faut disposer de moyens de déplacement très fins pour l'approche de la pointe et son déplacement parallèlement à la surface. Ce sont des actuateurs piézoélectriques qui ont résolu ce problème. La finesse de la pointe et la précision des déplacements permettent très couramment de reconstituer des images de surfaces avec une précision du 1/100 de nm. Pour cette invention Binnig et Rohrer ont reçu le prix Nobel en 1986.

Sur le même principe d'autres types de microscopes ont été inventés. La différence porte en général sur le type d'interaction entre pointe et surface : force de Van der Waals, force électrostatique, force magnétique. Ces nouveaux microscopes permettent de fabriquer des images multiples et complémentaires des surfaces mettant en évidence telle ou telle propriété:

densité électronique, densité d'états vides, localisation des moments magnétiques et des charges électriques etc.

L'utilisation de la lumière n'en a pas été abandonnée pour autant. On a cherché à dépasser la limite de diffraction qui dit que, en microscopie classique, il n'est pas possible de voir des détails inférieurs à la  $\frac{1}{2}$  longueur d'onde du rayonnement utilisé (soit 250 nm si on utilise de la lumière verte). Cette limite peut être abaissée si on consent à utiliser des rayonnements ultraviolets, mais ceci pose d'autres problèmes (notamment pour l'examen d'échantillons biologiques qui sont dégradés par les UV). Dans cette voie, les marges de progrès étaient limitées. De nouveaux instruments ont pourtant vu le jour en exploitant d'autres biais pour s'affranchir des limites :

**Microscope en champ proche optique.** Au lieu de regarder le champ lointain, soumis à la limite de diffraction, on regarde l'onde évanescente observable en champ proche. L'illumination et/ou la collection de lumière se font grâce à une fibre optique amincie et métallisée sur son pourtour que l'on approche à proximité immédiate de l'objet diffractant (à quelques nm). Le déplacement de la fibre est obtenu avec des techniques voisines de celles utilisées pour le déplacement de la pointe dans le microscope à effet tunnel. Il est possible de reconstituer une image de la surface avec une résolution qui peut atteindre 25 nm (le  $\frac{1}{20}$  de la longueur d'onde d'illumination).

Tous ces nouveaux instruments, dits microscopes à sonde locale, ont fortement contribué au développement et à la diffusion des nanotechnologies dans de nombreux laboratoires.

## **7 – Conclusions**

La description du domaine des nanosciences et des nanotechnologies à laquelle nous venons de nous livrer semble se résumer à une description peu corrélée de différents domaines et de multiples applications. Où est l'unité du domaine ? Quelle est la nature de l'évolution (ou de la révolution) proposée en titre ?

Certes le domaine est très composite, il concerne des disciplines variées et des objets dont les dimensions réelles s'échelonnent entre nanomètre et micromètre. Il existe tout de même un certain nombre de fils conducteurs.

- La genèse de toutes ces innovations montre qu'un des moteurs a été la technologie microélectronique qui pendant 40 ans années n'a cessé d'apporter en continu de nouvelles techniques, de miniaturiser les circuits et de réduire leur coût. Un des résultats a été le développement considérable de l'informatique et sa diffusion dans tous les domaines.
- Un autre résultat a été l'introduction de la miniaturisation et des nouveaux moyens de calcul dans d'autres secteurs techniques : biologie et biotechnologie, mécanique. Nanochimie et nanomatériaux ont également progressé en parallèle, mais de façon moins évidemment connectée. Dans tous ces secteurs, on a identifié de multiples innovations mais les projets en devenir sont encore plus nombreux.
- Il est aussi remarquable de constater combien cette évolution récente est marquée par le rapprochement des disciplines et des différents domaines du savoir. A l'échelle du nanomètre, physique, chimie, biologie et mécanique sont liées. Les savoirs et les compétences des différentes disciplines doivent absolument collaborer.
- Science fondamentale et technologie sont également indissolublement liées. La fabrication d'objets et la compréhension de leurs propriétés se doivent d'avancer simultanément.

Le terme « révolution des nanos » a été utilisé plus d'une fois. Il est clair que ce à quoi nous assistons n'est pas vraiment à une révolution mais plutôt à une progression tout à fait continue des savoirs et des techniques, avec parfois des sauts qualitatifs remarquables. Toutefois, l'informatique, née dans le dernier tiers du XXème siècle avec le concours indéniable des micro et nanotechnologies, a apporté une vraie révolution dans de nombreux domaines de la technique.

## **Faut-il avoir peur des nanos ?**

On ne peut terminer un tel article de présentation des nanosciences et des nanotechnologies sans évoquer les espoirs et les craintes voire la diabolisation dont ce domaine des sciences et des techniques a pu être l'objet.

On l'a dit, les dernières décennies ont vu le développement très rapide de la microélectronique et des télécommunications. Informatique et internet ont profondément changé les modes de communication, transformé les métiers et accéléré la mondialisation. Toutes ces transformations sociales génératrices d'angoisse, de déclassement voire de chômage ont été associées aux innovations techniques. Alors qu'auparavant la voiture, la machine à laver et la télévision étaient synonymes de progrès techniques, maintenant certains ne veulent voir que les aspects négatifs des innovations. Citons quelques unes de ces critiques unilatérales:

- La miniaturisation s'accompagne du développement des caméras de surveillance.
- Les puces RFID servent au marquage des individus,
- Le téléphone portable, outil de flicage des personnes
- La géolocalisation permet de localiser n'importe quel véhicule et bientôt n'importe quel téléphone s'ils sont équipés de GPS.
- Les chaussettes antibactériennes sont inutiles et même dangereuses (que deviennent les nanoparticules d'argent lorsque la chaussette s'use ou finit à la poubelle).
- Les nanotubes de carbone sont dangereux (on en a retrouvé dans le cerveau de souris exposées...).

Tout ceci est vrai... mais ...incomplet. Bien entendu, toutes ces affirmations devraient être contrebalancées par un relevé de l'utilité attendue de ces innovations. Le seul énoncé d'un inconvénient ne peut suffire à disqualifier une invention. L'automobile ce n'est pas seulement des accidents de la route et de la pollution.

Les quelques assertions relevées ci-dessus, parmi beaucoup d'autres, mettent en évidence les préoccupations que génèrent les nouveautés. Toute innovation, tout nouveau produit apporte à la fois avantages et inconvénients, utilité réelle et possibilité d'un usage abusif. Mais il serait tout aussi excessif d'affirmer que toutes les innovations sont bonnes et utiles que de jeter à la poubelle tout ce qui paraît issu des nanotechnologies. Cependant, comme les nouveaux objets et les nouveaux usages nous arrivent à flux continu, il est difficile de faire le tri entre le bon, le moins bon et le franchement mauvais. Nos usages n'ont pas le temps de s'adapter aux nouvelles techniques. Ceci est d'autant plus difficile que les promoteurs des nouveaux objets les proposent, voire les imposent, avec force marketing. Qui décide des produits qui survivront ? Le marché. La demande des clients (stimulée par toutes les ressources de la suggestion et de la communication) sera reine.

Certes, l'excès des critiques répond sans doute à l'excès d'enthousiasme des chercheurs. Il se braque contre les extrapolations osées des prophètes d'un monde et d'un homme nouveaux. En effet, à en croire certains, grâce aux technologies toutes les limites et les pesanteurs que nous connaissons seraient bientôt balayées: vie sans fin, pouvoirs physique et

intellectuel décuplés, monde sans pollution, énergie gratuite etc... Ces visions transhumanistes propagées complaisamment rendent bien facile la critique de tout un pan de la recherche technologique contemporaine<sup>1</sup>.

Comment séparer l'utile du futile ? Comment établir l'équilibre entre accueil raisonné aux innovations et refus des produits dangereux pour la santé ou l'autonomie de la personne ? Force est de constater qu'il n'est pas simple de tenir un juste équilibre entre de nombreux courants contradictoires. Comme il n'est pas possible de s'en remettre à la sagesse supposée des « inventeurs », il n'est pas non plus admissible de faire confiance aux seules lois du marché. La nécessité d'une régulation sociale apparaît donc tout à fait indispensable. Sa mission doit être d'éviter la production et la dissémination des produits dangereux, de protéger la vie privée et l'autonomie des personnes, de favoriser les innovations socialement utiles.

Bien que nos sociétés ne manquent pas de ressources pour contrôler l'innocuité des produits mis sur le marché, surveiller les dérives en matière de fichage ou d'atteinte à la vie privée, il faut réaffirmer l'importance de la vigilance des citoyens et du fonctionnement des institutions démocratiques. Tous ces sujets sont d'ailleurs abordés dans d'autres articles de ce dossier.

Les nanosciences et les nanotechnologies promettent beaucoup. On peut espérer qu'elles sauront effectivement contribuer à relever un certain nombre des défis auxquels la société se trouve confrontée: pollution, besoin d'énergie propre et en quantité suffisante, santé et vieillissement ... A charge pour elles de montrer qu'elles en sont capables sans pour autant induire de nouveaux risques ni apporter de nouvelles pollutions, ni mettre en péril les droits légitimes des personnes.

## ***Bibliographie***

**Les nanosciences, 1. Nanotechnologie et nanophysique ; 2. Nanomatériaux et nanochimie ; 3. Nanobiotechnologies et nanobiologie**

Ouvrage collectif sous la direction de M. Lahmani, C. Bréchnac, P. Houdy (Editions Belin)

---

<sup>1</sup> On en trouvera des exemples remarquables dans le rapport d'un colloque organisé à l'initiative de la National Nanotechnology Initiative aux USA en 2001 sur le thème « Societal implications of nanoscience and nanotechnology ». Ce rapport est disponible à l'adresse suivante : <http://www.wtec.org/loyola/nano/NSET.Societal.Implications/nanosi.pdf>
